# Supplementary material
Source: PubMed Central journal article supplement (PMC5678362)
Supplement: Supp_Figure2.pdf [file Supp_Figure2.pdf]

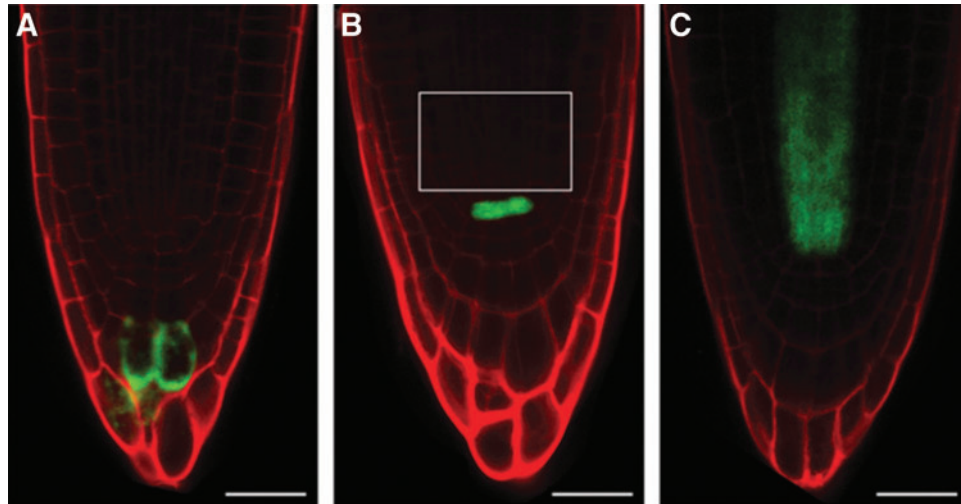

**SUPPLEMENTARY FIG. S2. The distribution of GFP-tagged markers in different cell types in embryonic root of germinating Arabidopsis seeds.** The *white box* indicates the cell proliferation zone in which all the measurements of cellular redox state were made. (A) *PLT3::GFP*. (B) *WOX5::GFP* (C) *WOL::GFP*. Scale bar = 25  $\mu\text{m}$ .
