# Supplementary material
Source: PubMed Central journal article supplement (PMC5678362)
Supplement: Supp_Figure3.pdf [file Supp_Figure3.pdf]

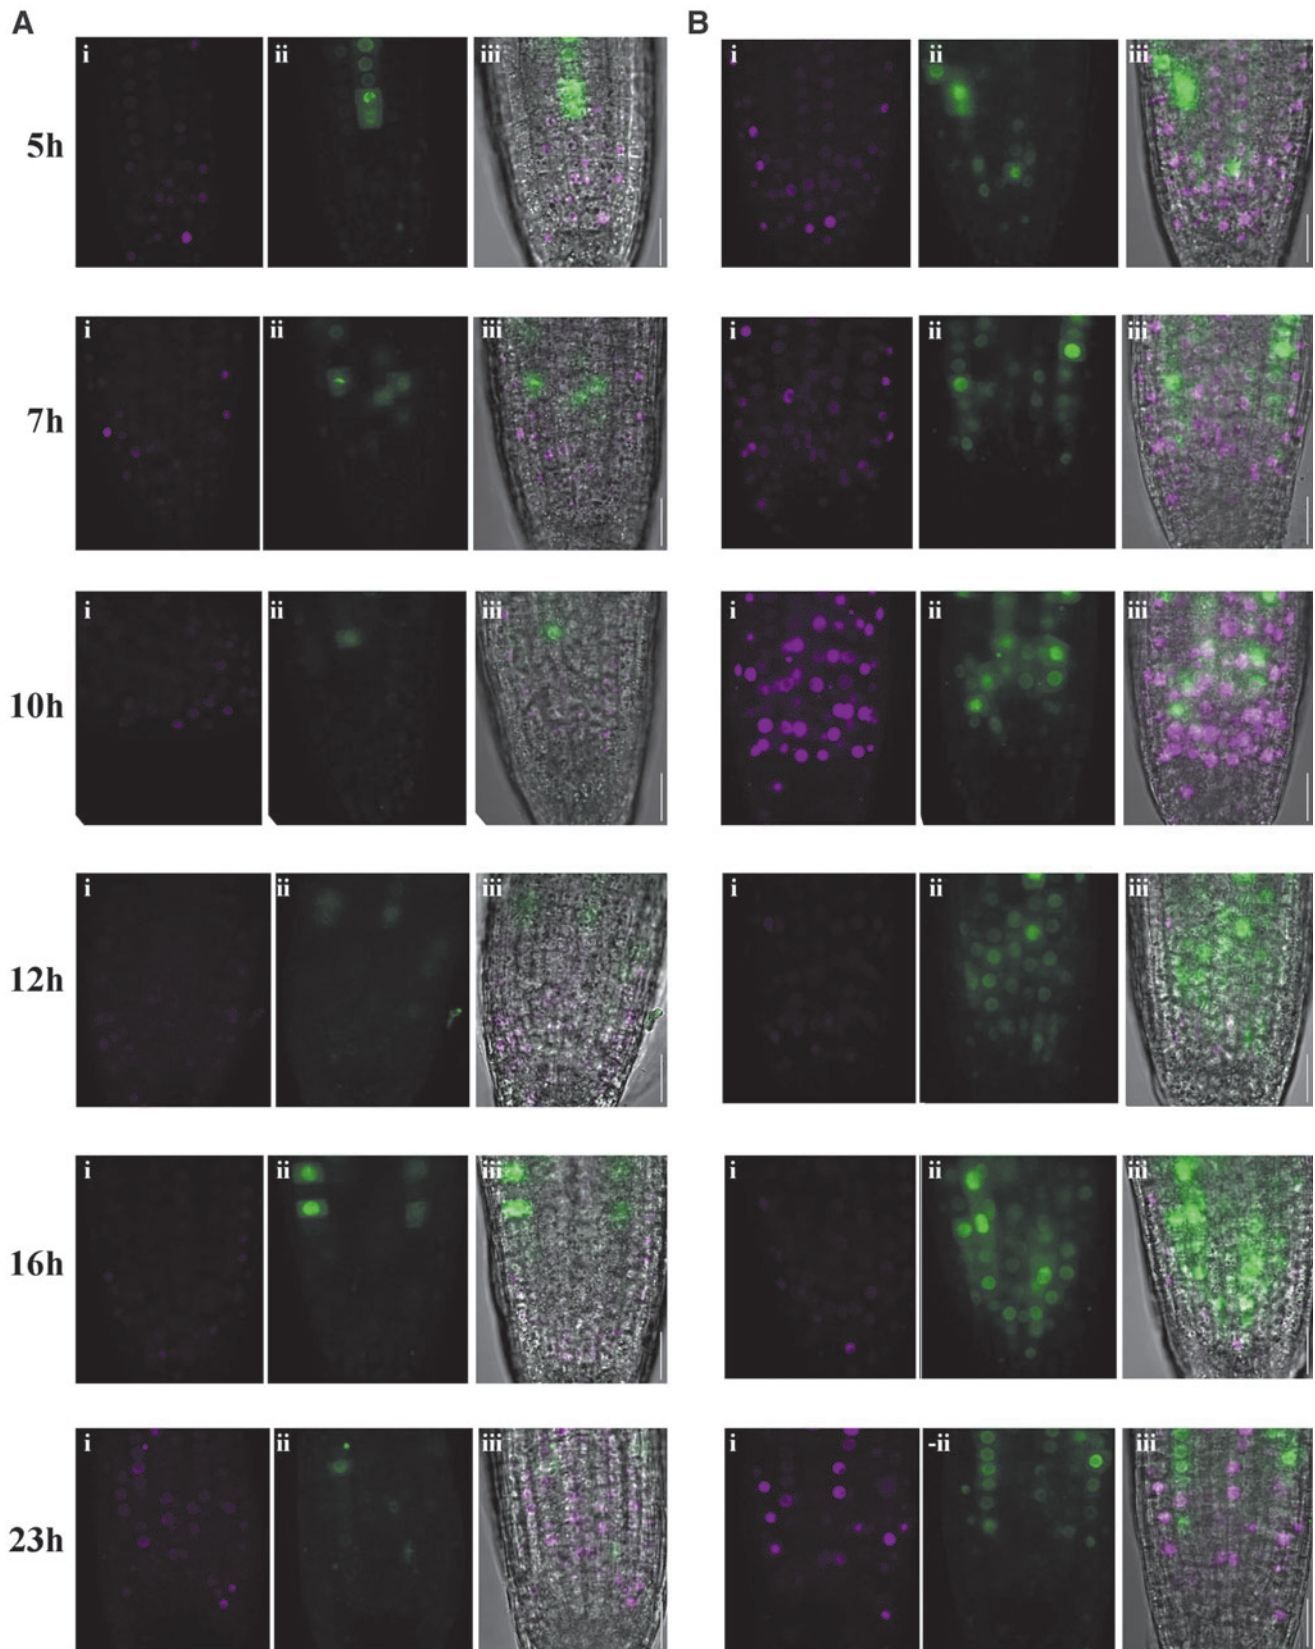

**SUPPLEMENTARY FIG. S3. The use of Cytrap markers to identify nuclei in the S and G2/M phases of the cell cycle in the proliferation zones of the embryonic roots of Arabidopsis seedlings.** Expression of cell cycle tracking in plant cell (Cytrap) markers showing S (*pHTR2::CDT1a-RFP*) (i) and G2/M (*pCYCB1::CYCB1-GFP*) (ii) phase nuclei in the proliferation zone of the embryonic root apical meristem in either the absence (A) or presence of HU (B). HU, hydroxyurea.
