# Supplementary material
Source: PubMed Central journal article supplement (PMC5678362)
Supplement: Supp_Figure4.pdf [file Supp_Figure4.pdf]

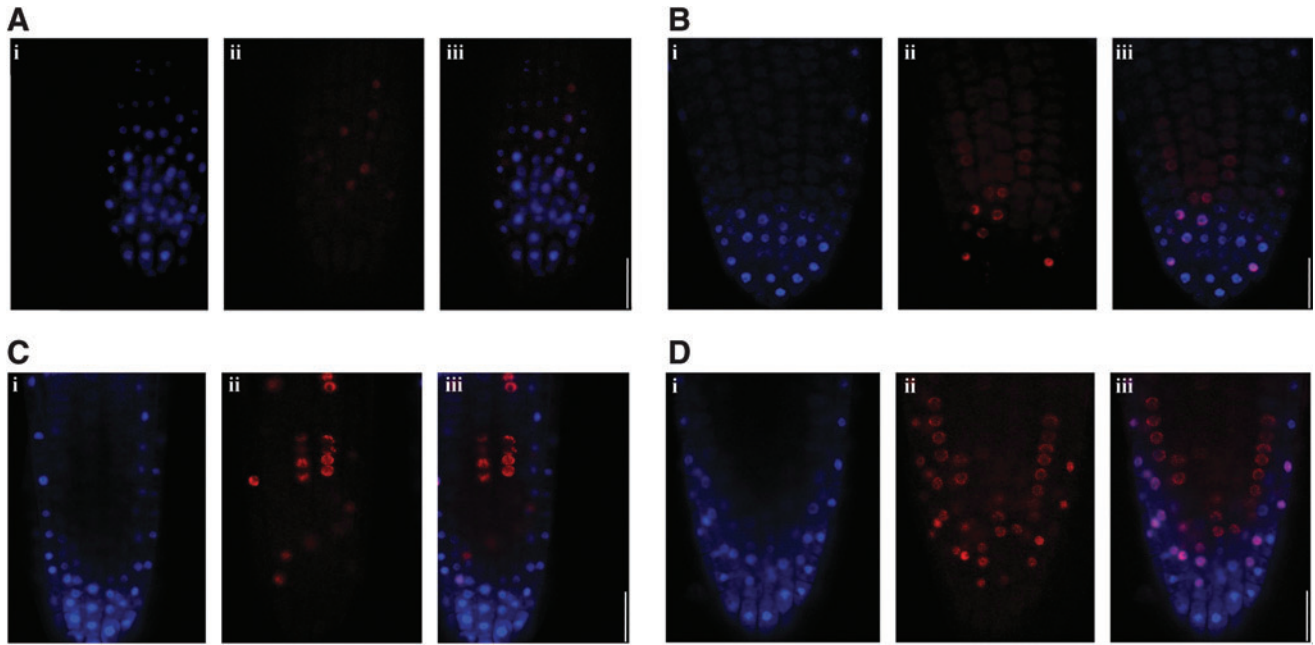

**SUPPLEMENTARY FIG. S4. EdU incorporation and DAPI staining of roots.** Roots were stained with DAPI (i) and EdU (ii) or both (iii) in the absence (A, B) or presence of HU (C). Samples were also incubated in EdU (ii) for 2 h and then stained with DAPI (i) at 17 h of HU treatment (D). Scale bar 25  $\mu$ m. EdU, 5-ethynyl-2'-deoxyuridine.
