# Supplementary material
Source: PubMed Central journal article supplement (PMC5678362)
Supplement: Supp_Figures2-5.pdf [file Supp_Figures2-5.pdf]

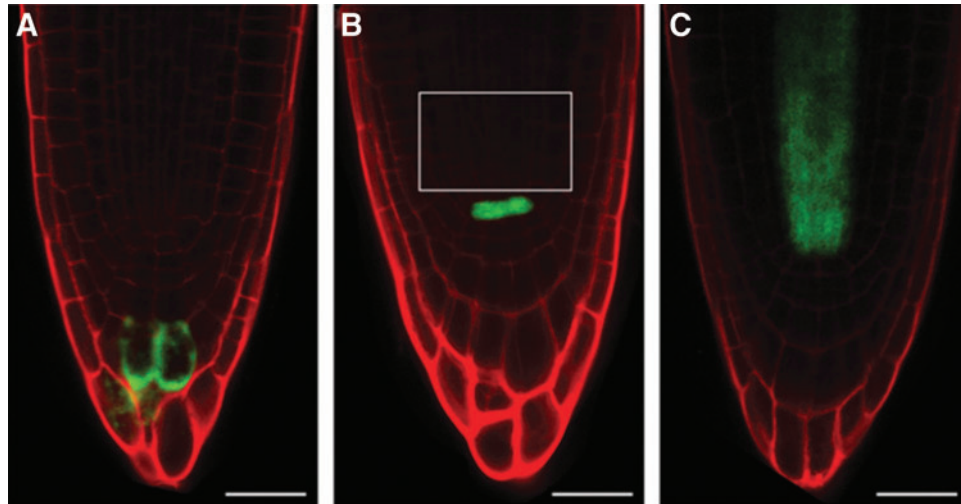

**SUPPLEMENTARY FIG. S2. The distribution of GFP-tagged markers in different cell types in embryonic root of germinating Arabidopsis seeds.** The *white box* indicates the cell proliferation zone in which all the measurements of cellular redox state were made. (A) *PLT3::GFP*. (B) *WOX5::GFP* (C) *WOL::GFP*. Scale bar = 25  $\mu\text{m}$ .

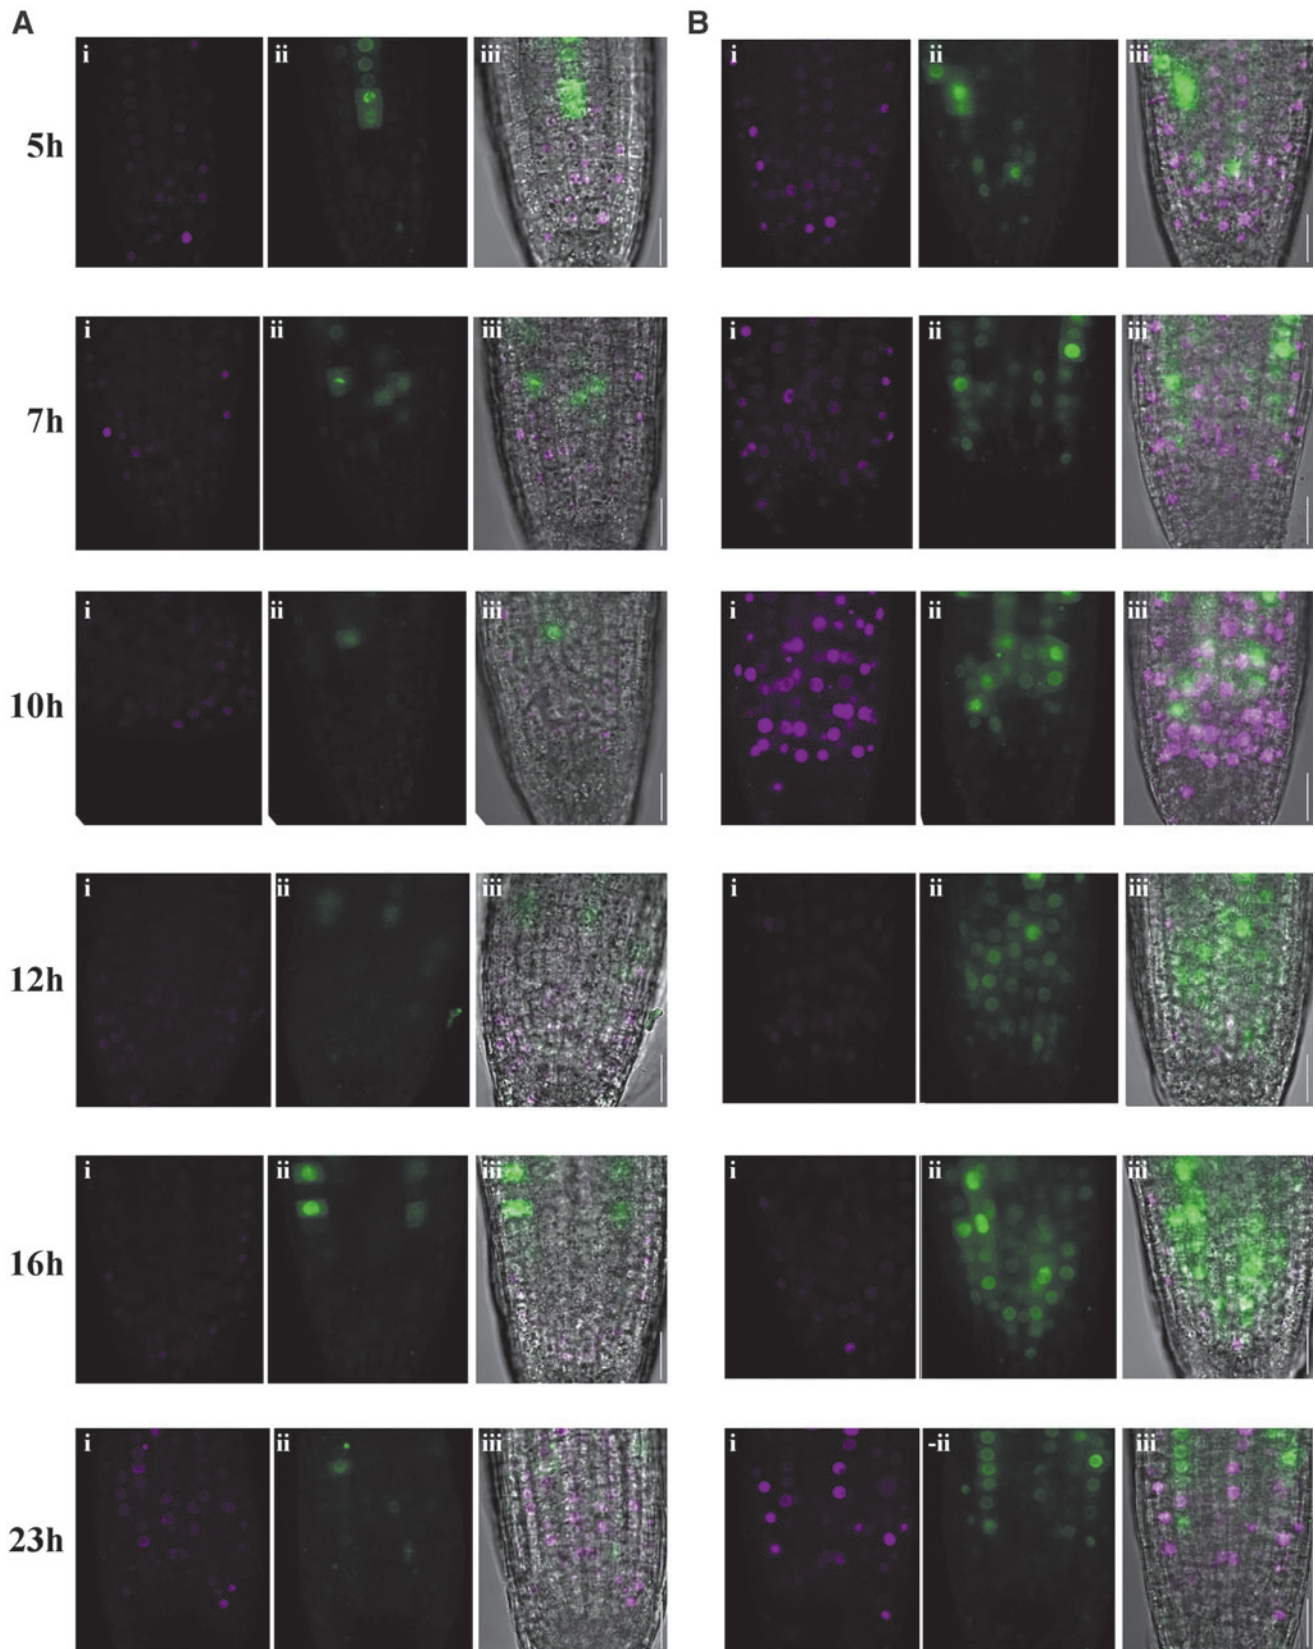

**SUPPLEMENTARY FIG. S3. The use of Cytrap markers to identify nuclei in the S and G2/M phases of the cell cycle in the proliferation zones of the embryonic roots of Arabidopsis seedlings.** Expression of cell cycle tracking in plant cell (Cytrap) markers showing S (*pHTR2::CDT1a-RFP*) (i) and G2/M (*pCYCB1::CYCB1-GFP*) (ii) phase nuclei in the proliferation zone of the embryonic root apical meristem in either the absence (A) or presence of HU (B). HU, hydroxyurea.

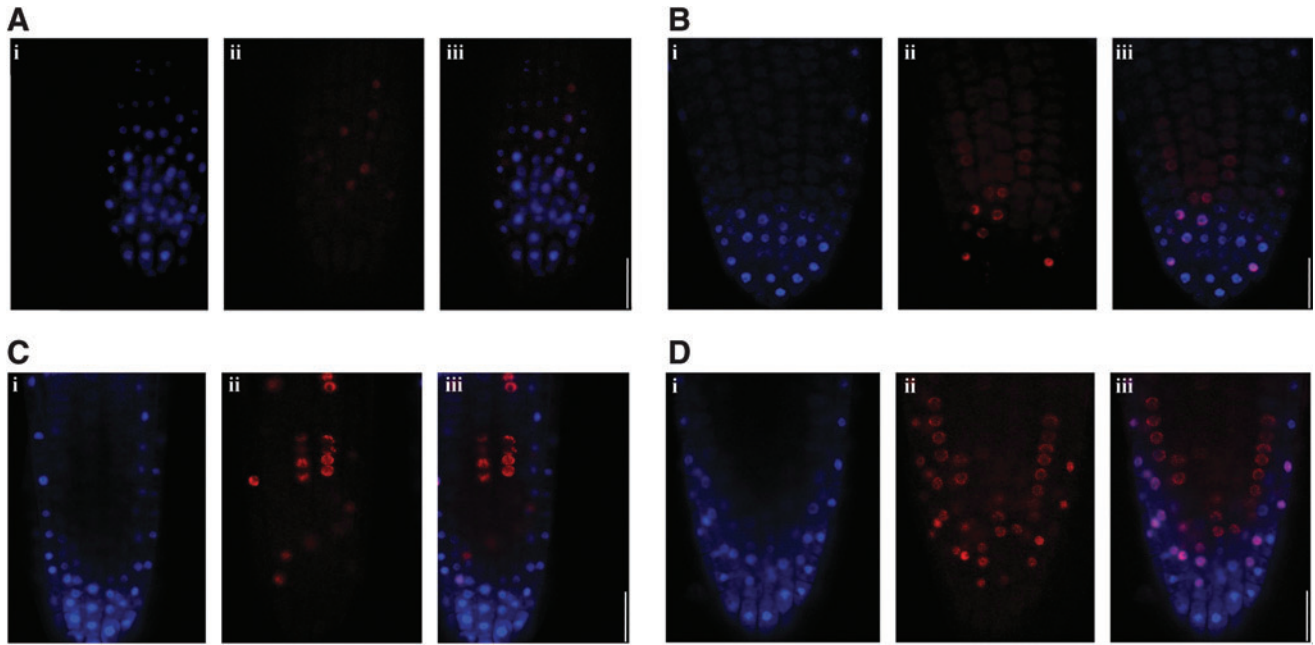

**SUPPLEMENTARY FIG. S4. EdU incorporation and DAPI staining of roots.** Roots were stained with DAPI (i) and EdU (ii) or both (iii) in the absence (A, B) or presence of HU (C). Samples were also incubated in EdU (ii) for 2 h and then stained with DAPI (i) at 17 h of HU treatment (D). Scale bar 25  $\mu\text{m}$ . EdU, 5-ethynyl-2'-deoxyuridine.



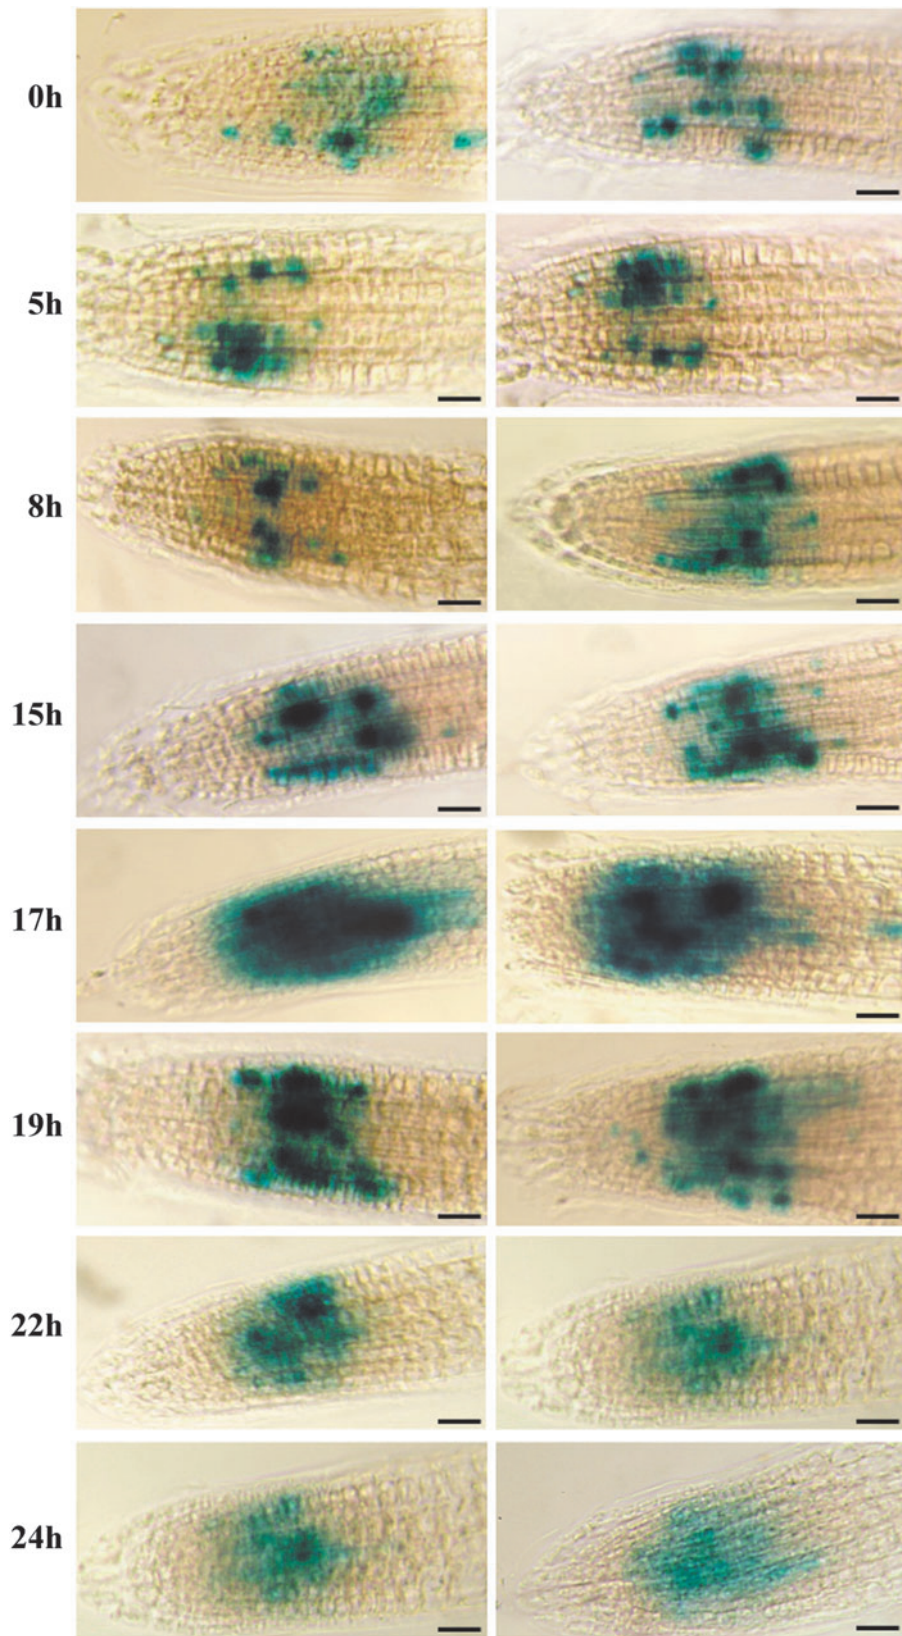

**SUPPLEMENTARY FIG. S5.** Expression of the *pCYCB1:CYCB1-GUS* marker with time after the application of HU (at time 0) in proliferation zones of embryonic roots.
