# Supplementary material
Source: PubMed Central journal article supplement (PMC5678362)
Supplement: Supp_Table7.pdf [file Supp_Table7.pdf]

SUPPLEMENTARY TABLE S7. SEQUENCES AND ACCESSION NUMBERS FOR PRIMERS  
FOR SELECTED CELL CYCLE MARKERS

| <i>Primers</i> | <i>Sequence</i>              | <i>Target</i> |
|----------------|------------------------------|---------------|
| CYCB1;2 fwd    | 5'-TTCTTGGAACCTCGAATGG-3'    | At5g06150     |
| CYCB1;2 rev    | 5'-TCTGGATCAGACATCGAAGC-3'   |               |
| CYCB2;1 fwd    | 5'-CCTCAGTTCCAAGTGCTAACG-3'  | At2g17620     |
| CYCB2;1 rev    | 5'-GGTTTCTCAAGCGACATTGG-3'   |               |
| CYCA1;1 fwd    | 5'-CGTTAATGCCAGTTTCTCTAGC-3' | At1g44110     |
| CYCA1;1 rev    | 5'-TGAGCCATCATCAGATTTGC-3'   |               |
| CYCA3;1 fwd    | 5'-CTAGGTTTCATCATCCGTCCA-3'  | At5g43080     |
| CYCA3;1 rev    | 5'-CATTCTTTCAAATCACCCGC-3'   |               |
| CYCD3;1 fwd    | 5'-AACAGTCCTTCATCTGGGAG-3'   | At4g34160     |
| CYCD3;1 rev    | 5'-CTGCTATGTGCATCAGCCAT-3'   |               |
| CYCD5;1 fwd    | 5'-GACACCTCCACCGGAAATAG-3'   | At4g37630     |
| CYCD5;1 rev    | 5'-CTACGCATTCTCTGGCTGG-3'    |               |
