# Supplementary material
Source: PubMed Central journal article supplement (PMC5678362)
Supplement: Supp_Table8.pdf [file Supp_Table8.pdf]

SUPPLEMENTARY TABLE S8. SEQUENCES AND ACCESSION NUMBERS FOR PRIMERS FOR HOUSEKEEPING GENES

| <i>Primers</i> | <i>Sequence</i>              | <i>Target</i> |
|----------------|------------------------------|---------------|
| CYCB1;2 Fwd    | 5'-TTCTTGAAAACCTCGAATGG-3'   | At5g06150     |
| CYCB1;2 Rev    | 5'-TCTGGATCAGACATCGAAGC-3'   |               |
| CYCB2;1 Fwd    | 5'-CCTCAGTTCCAAGTGCTAACG-3'  | At2g17620     |
| CYCB2;1 Rev    | 5'-GGTTTCTCAAGCGACATTGG-3'   |               |
| CYCA1;1 Fwd    | 5'-CGTTAATGCCAGTTTCTCTAGC-3' | At1g44110     |
| CYCA1;1 Rev    | 5'-TGAGCCATCATCAGATTTGC-3'   |               |
| CYCA3;1 Fwd    | 5'-CTAGGTTTCATCATCCGTCCA-3'  | At5g43080     |
| CYCA3;1 Rev    | 5'-CATTCCTTCAAATCACCCGC-3'   |               |
| CYCD3;1 Fwd    | 5'-AACAGTCCTTCATCTGGGAG-3'   | At4g34160     |
| CYCD3;1 Rev    | 5'-CTGCTATGTGCATCAGCCAT-3'   |               |
| CYCD5;1 Fwd    | 5'-GACACCTCCACCGGAAATAG-3'   | At4g37630     |
| CYCD5;1 Rev    | 5'-CTACGCATTCTCTTGGCTGG-3'   |               |
